# Supplementary material for: Colorimetric and Fluorescent Sensing of Copper Ions in Water through o-Phenylenediamine-Derived Carbon Dots
Source: Sensors (Basel). 2023 Mar 10;23(6):3029. doi: 10.3390/s23063029 (PMC10056730; doi:10.3390/s23063029)
Supplement: Supplementary file 1 [file sensors-23-03029-s001.zip › sensors-2249416-supplementary.pdf]

## Supplementary Materials

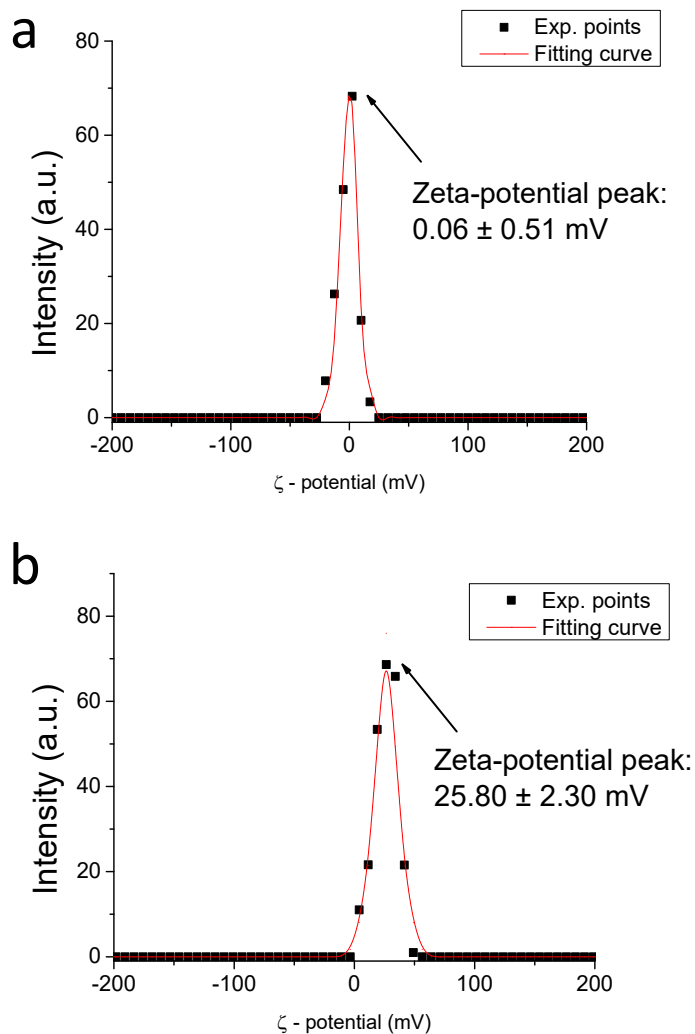

**Figure S1.** Zeta potential of NSCDs sensing solution: (a) with no  $\text{Cu}^{2+}$ ; and (b) with  $100 \mu\text{M}$   $\text{Cu}^{2+}$ .

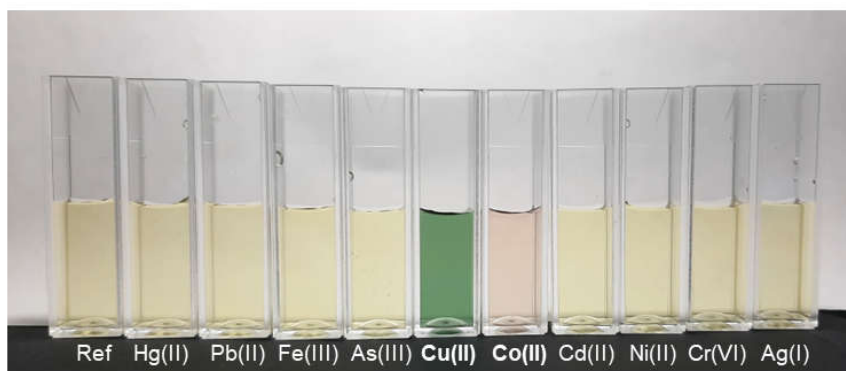

**Figure S2.** Selective visual response of NSCDs sensing solution under white light upon the addition of different HM ions at a concentration of  $100 \mu\text{M}$ .

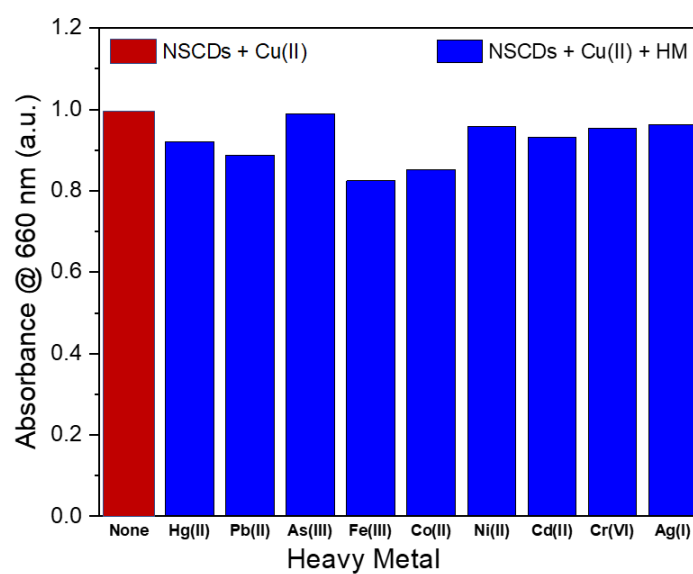

**Figure S3.** Interference from other HMs (blue bars) in the NSCDs sensing solution.

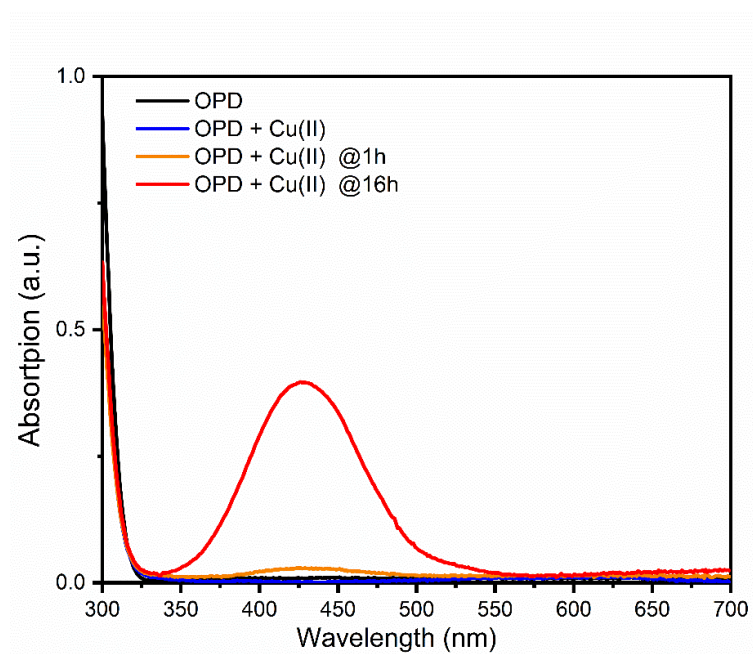

**Figure S4.** Absorbance spectra of OPD at a concentration of 100  $\mu$ M in DI water (black curve), the OPD solution immediately after the addition of 100  $\mu$ M Cu(II) (blue), after 1 h (orange) and after 16 h at room temperature (red).

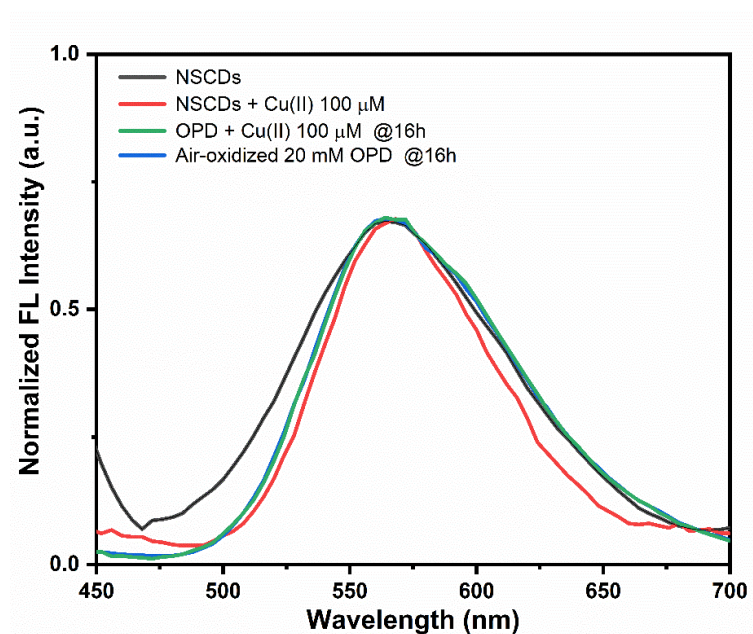

**Figure S5.** Fluorescence emission spectra of NSCD sensing solution (black curve), NSCD sensing solution 10 minute after the addition of 100  $\mu\text{M}$  Cu(II) (red), OPD at a concentration of 100  $\mu\text{M}$  in DI water 16 hours after the addition of 100  $\mu\text{M}$  Cu(II) (green), OPD at a concentration of 20 mM in DI water 16 hours after exposure to air. All the spectra are excited at  $\lambda_{\text{exc}} = 430$  nm and normalized to the intensity at 564 nm.

**Table S1.** Fluorescence lifetime @564 nm.

| Samples          | Lifetime ( $\tau$ ) ns | $\chi^2$ |
|------------------|------------------------|----------|
| NSCDs            | 1.83                   | 6.24     |
| NSCDs + Cu(II)   | 1.76                   | 8.65     |
| OPD + Cu(II)     | 1.55                   | 9.42     |
| Air-oxidized OPD | 1.4                    | 7.34     |

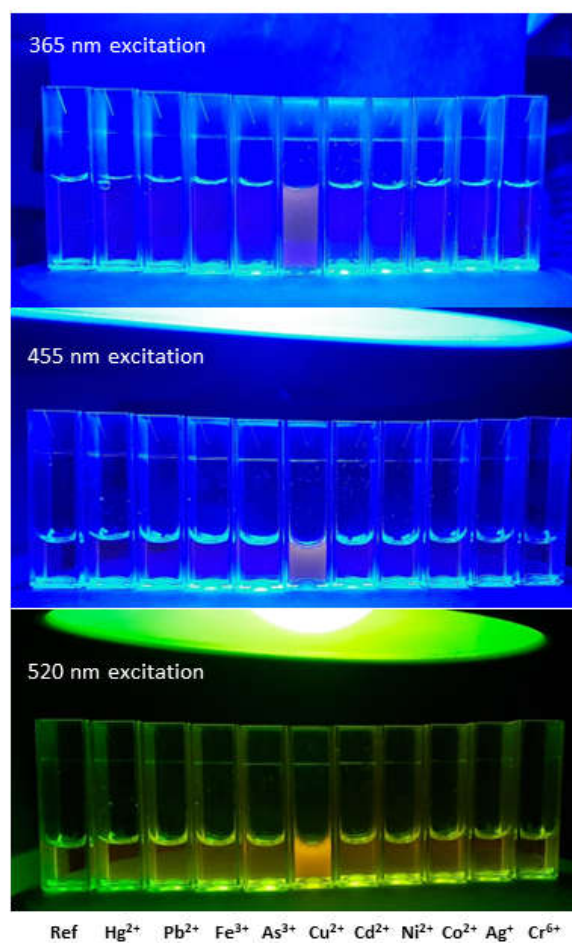**Figure S6.** Fluorescence of NSCD sensing solution under different light excitations upon the addition of different HM ions at a concentration of 100  $\mu$ M.

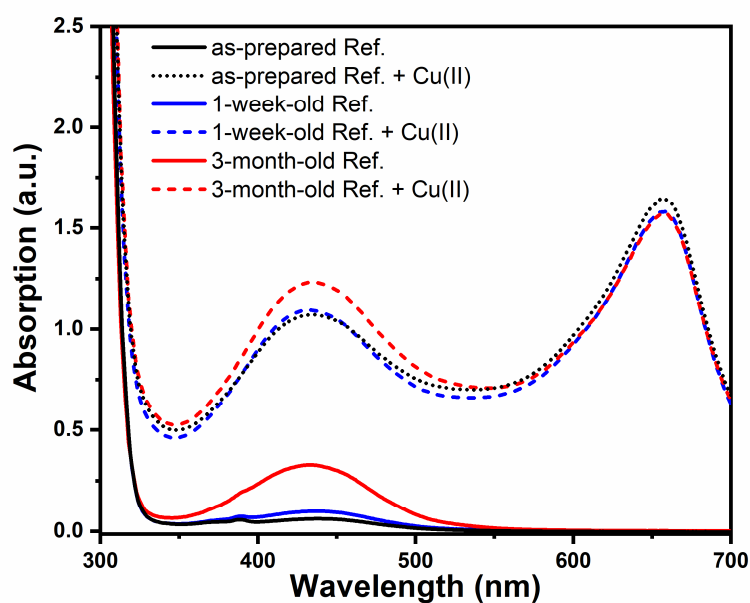

Figure S7. Long-term stability of the absorption spectrum of the NSCD sensing solution stored as concentrated mother solution and prepared by dilution immediately before the sensing experiment.

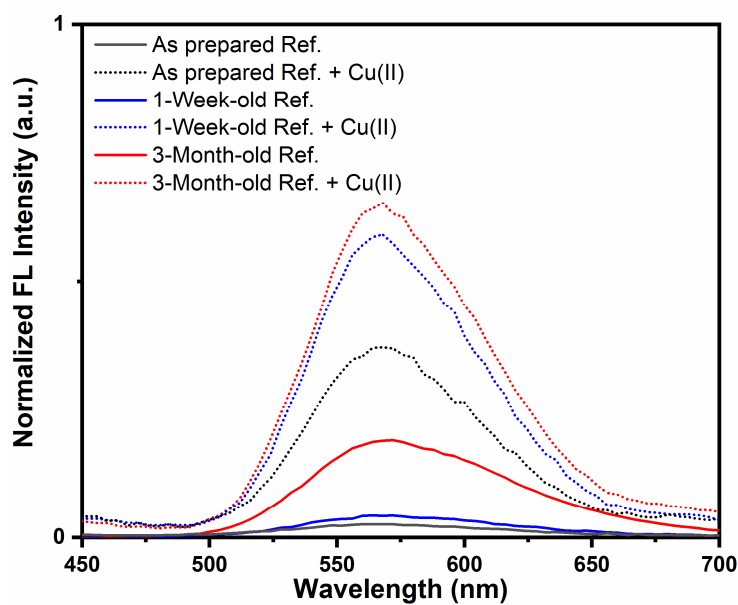

Figure S8. Long-term stability of the fluorescence spectrum of the NSCD sensing solution stored as concentrated mother solution and prepared by dilution immediately before the sensing experiment.

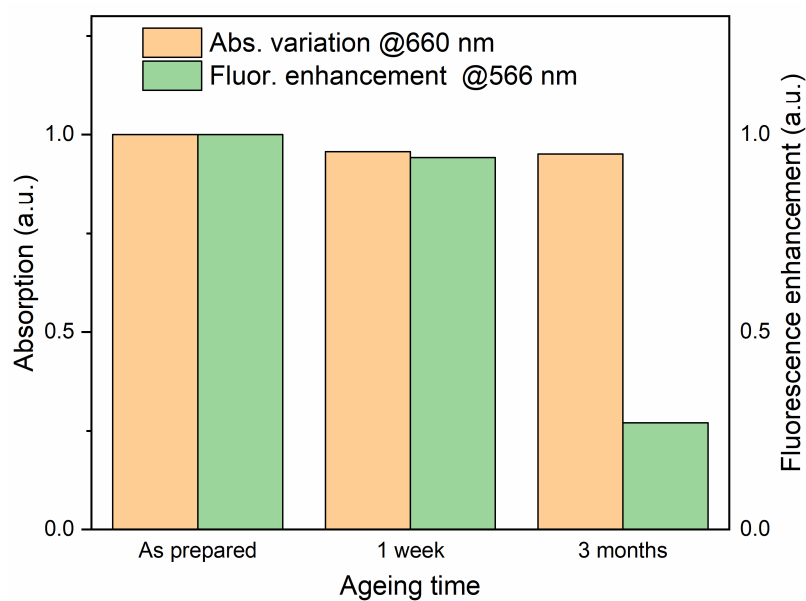

**Figure S9.** Long-term stability of the absorption variation and the fluorescence enhancement of the NSCD sensing solution. Both the quantities are normalized to the respective initial values.

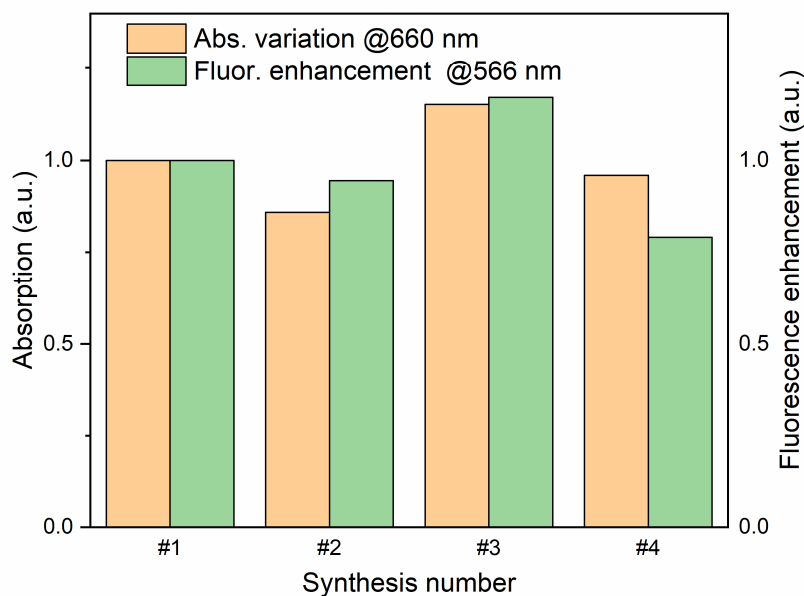

**Figure S10.** Reproducibility of the absorption variation and the fluorescence enhancement of the NSCD sensing solutions prepared on different days.

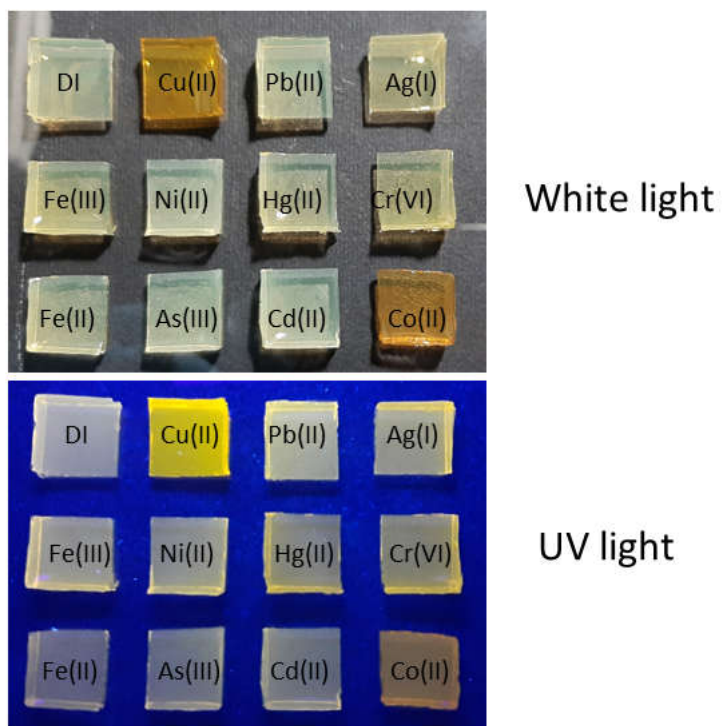

**Figure S11.** Selectivity of sensing with hydrogel Aga-NSCD films. Photographs of hydrogel Aga-NSCD films after immersion in a DI water solutions of different HMs.
